# Supplementary material
Source: publisher figshare collection journal article supplement (https://frontiersin.figshare.com/ndownloader/files/15743567)
Supplement: Supplementary file 1 [file 15743567]

## Sheet: Sheet1
Supplementary Table 1
Analytical data of geochemical and sedimentological compositions of surface sediments from off northwest Hainan Island, the Gulf of Tonkin.
Sample No.	Major oxides (wt. %)									Trace elements (ppm)								Sand (%)	Silt (%)	Clay (%)	TOC (%)	CaCO3 (%)
	TiO2	Al2O3	TFe2O3	MnO	MgO	CaO	Na2O	K2O	P2O5	As	Cd	Cr	Cu	Pb	Ni	V	Zn
Bulk sediments (<230 microm)
A04	0.781184	12.662	5.72507	0.0861895	1.91114	2.89296	2.20766	2.15619	0.127693	13.651	0.095288	69.912	21.9341	39.9785	33.6098	97.1359	95.6091	81.2	16.02	2.78	0.736994	6.17284
A06	0.902332	13.4932	5.70956	0.0814516	1.93066	2.77322	1.82024	2.22942	0.126135	11.824	0.128185	70.6291	23.6427	36.8909	33.887	101.518	101.501	50.7	44.92	4.38	0.708259	6.53595
A08	0.922797	13.5319	6.0414	0.0826613	1.9209	2.79758	1.81307	2.18365	0.120491	12.229	0.127051	71.2865	23.3825	37.7829	32.7596	105.555	100.614	63.1	33.88	3.02	0.683863	3.33333
A09	0.95077	15.0011	6.23058	0.0916331	2.07414	1.97058	2.51821	2.33621	0.134311	14.074	0.133857	77.5417	25.7676	42.2428	36.456	115.007	114.194	60	36.39	3.61	0.836769	3.26797
A10	0.984811	14.4888	6.07035	0.0930444	2.17175	1.92695	2.64632	2.47352	0.144044	13.815	0.108901	80.6991	29.5403	42.2428	40.7994	120.915	118.061	59	37.64	3.36	0.861872	6.60066
A11	1.02194	13.3289	5.87393	0.0922379	2.13076	2.13497	2.87693	2.34943	0.149202	13.754	0.148604	78.6572	25.6288	40.2072	37.1953	116.977	113.33	67.9	29.07	3.03	0.859827	6.47249
A11a	0.991393	13.9862	5.99385	0.0849798	2.00582	2.98226	2.10107	2.24264	0.134798	12.759	0.138394	79.2947	23.9289	37.0968	35.8554	107.622	101.706	55.6	40.74	3.66	0.688333	6.60066
A14	1.06338	13.8605	6.17683	0.083871	2.01363	2.67683	1.84586	2.23145	0.145698	13.566	0.132723	81.3366	26.314	37.8515	40.7069	115.204	108.973	53.6	42.59	3.81	0.814553	6.53595
A14a	1.09938	13.7735	6.27297	0.0829637	1.92773	2.84121	1.95758	2.11144	0.144141	12.245	0.134991	86.2172	25.5507	37.6228	38.9696	113.432	108.371	63.4	33.61	2.99	0.771745	9.80392
A15	1.10349	13.0969	5.96904	0.0943548	1.96287	2.65958	2.12054	2.24467	0.142973	12.002	0.121379	82.9302	26.9384	39.5668	41.8528	115.5	107.256	49.1	46.86	4.04	0.796782	3.26797
A16	1.02029	14.3728	5.98144	0.0850806	1.9619	2.20397	1.95656	2.23552	0.135674	12.507	0.133857	77.1034	25.3773	37.8973	37.1306	104.472	102.82	53.8	42.47	3.73	0.717499	16.0256
B06	0.612216	8.26315	2.98969	0.0360887	0.899251	1.0067	1.09051	1.90802	0.0707566	5.493	0.0862129	35.8773	11.4571	24.0603	15.562	53.3681	46.0302	69.5	27.39	3.11	0.380609	3.26797
B07	1.07058	14.5274	6.27607	0.0881048	1.83208	1.70879	2.42494	2.19382	0.153484	5.754	0.105497	84.1554	27.7277	43.3634	38.1656	126.134	119.995	51.4	44.33	4.27	0.941439	2.82486
B08	0.965682	14.5564	5.92355	0.0857863	2.121	2.3237	2.27633	2.4013	0.135284	12.629	0.139529	82.3525	27.4328	37.3255	38.4706	112.25	110.316	57.7	38.65	3.65	0.742347	3.26797
B09	0.992627	14.2568	6.01556	0.0887097	2.08781	1.98377	2.43519	2.40029	0.139761	12.545	0.116841	81.5258	27.5802	41.6938	38.1841	118.552	114.194	59.9	36.77	3.33	0.79199	6.66667
B12	0.877958	12.9229	5.1813	0.0597782	1.19276	1.90767	1.769	1.88972	0.155236	8.786	0.136126	64.7625	23.4692	32.0194	34.2567	96.9685	90.2633	89.1	9.35	1.55	1.11819	25.3623
C01	0.751772	14.4695	5.11204	0.0518145	1.60954	2.62609	2.47209	2.26807	0.11942	9.663	0.153141	66.147	21.5351	33.6433	29.4883	90.0956	97.8839	62.5	33.8	3.7	0.98242	9.70874
C02	0.864795	13.5126	5.54726	0.0761089	2.03608	2.52056	2.86565	2.43385	0.12925	10.502	1.75489	71.4658	53.5993	98.048	58.6624	101.518	106.141	63.3	33.48	3.22	0.984095	3.26797
C03	0.61561	9.31574	3.96764	0.0510081	1.4153	4.53579	1.66548	2.19179	0.0933364	7.999	0.108901	47.282	12.5672	19.8566	22.576	60.9499	57.734	84.8	13.49	1.71	0.786089	9.90099
C04	0.644097	10.4872	4.72333	0.0715726	2.16492	9.96758	1.79769	1.92125	0.117473	9.365	0.11911	55.7184	15.8196	27.6282	27.2612	66.7988	68.3572	68.5	27.95	3.55	0.55144	19.802
C07	0.566143	9.52838	3.76192	0.0533266	1.58806	7.14869	1.49637	2.04431	0.0920711	7.165	0.0907504	44.513	13.4172	23.1455	22.8347	57.3264	56.0393	77.8	19.89	2.31	0.49328	12.6984
C09	0.490657	8.759	3.14992	0.0367944	1.17031	2.31051	1.08846	1.83174	0.0642357	7.305	0.115707	41.993	11.9601	19.1865	16.3567	45.422	50.8073	70.6	26.23	3.17	0.529585	3.23625
D03	0.586814	7.62715	2.66405	0.0384073	0.456312	3.27652	1.26577	3.97776	0.0457436	4.599	0.180366	11.9425	7.73374	22.2992	10.7566	22.8341	19.5518	64.8125	31.9417	3.24583	0.0371332	0.326797
D11	1.20089	6.865	5.67721	0.072306	0.806834	8.49814	1.24176	2.76033	0.0795312	13.147	0.78408	26.1287	16.014	28.5504	8.06058	45.3642	46.91	81.7	15.87	2.43	0.128659	20
D13	0.640497	13.1453	7.77402	0.0908266	1.4641	2.8057	1.69315	3.09698	0.0883727	15.52	0.192845	32.451	143.192	30.6014	17.0221	65.9618	80.368	61.3	35.21	3.49	1.28357	2.49191
Fine sediments (<63 microm)
A04	0.965271	13.7542	5.64857	0.096371	2.18639	2.13294	2.67092	2.45623	0.145212	12.295	0.102094	75.191	24.2671	42.1741	34.4877	112.349	109.406		16.02	2.78		3.26797
A06	0.929031	13.959	5.31716	0.0780075	1.95425	2.58662	1.9078	2.29763	0.137083	12.197	0.143932	75.0408	22.6172	36.2907	31.8814	101.626	93.4666		44.92	4.38		6.41026
A08	0.934041	14.3664	5.805	0.0809963	1.99827	2.77437	1.9922	2.26623	0.137483	13.143	0.139503	75.0208	24.8924	38.1799	34.766	110.267	103.774		33.88	3.02		9.80392
A09	0.972778	14.2375	5.79433	0.0913306	2.06634	2.03654	2.35935	2.41249	0.133727	13.07	0.141798	79.7031	24.935	43.7522	34.5524	111.167	108.826		36.39	3.61		3.23625
A10	0.957146	13.5995	5.55966	0.0885081	2.08586	2.18266	2.61865	2.42266	0.147353	12.766	0.116841	75.44	25.1084	43.3634	35.1715	111.856	108.041		37.64	3.36		6.47249
A11	1.00507	12.3817	5.5607	0.0830645	1.86624	2.47287	2.94662	2.13381	0.136257	12.09	0.0975567	76.2966	22.5585	37.7143	33.351	107.327	94.8925		29.07	3.03		6.34921
A11a	0.960746	11.9854	4.86289	0.0709677	1.74619	3.59413	1.79769	2.0494	0.117181	9.74	0.116841	69.2646	17.9185	31.4934	28.2407	85.8124	75.8867		40.74	3.66		6.53595
A14	1.12817	14.4888	6.20991	0.0857863	2.02339	2.70321	1.96373	2.2996	0.141026	14.767	0.117976	84.0458	25.0217	42.0827	37.8699	118.749	107.893		42.59	3.81		9.61538
A14a	1.17164	14.3276	5.97068	0.0814944	1.95034	2.89321	1.81627	2.20038	0.155407	10.956	0.120681	82.7985	25.3582	36.6021	37.7538	110.071	97.7252		33.61	2.99		9.80392
A15	1.11745	13.5419	5.49818	0.0837858	1.87209	2.95314	1.92508	2.12845	0.146996	10.001	0.112931	80.0728	22.0977	32.6367	35.0189	101.037	90.4644		46.86	4.04		6.53595
A16	0.996508	13.6389	5.36114	0.0790037	1.87698	2.35392	1.79186	2.23179	0.141689	11.037	0.128432	74.6015	21.9633	33.5917	31.8814	98.7789	91.5652		42.47	3.73		3.23625
B06	1.12052	13.7941	5.52375	0.0732254	1.88872	2.08427	2.19864	2.31283	0.139887	9.973	0.149468	82.5289	24.9192	37.8062	34.5038	113.311	98.3033		27.39	3.11		3.20513
B07	0.774244	12.9502	4.46727	0.0663512	1.787	1.94446	1.76034	2.01398	0.116656	11.362	0.0841448	56.9795	19.2224	29.6055	29.4556	81.9982	78.2891		44.33	4.27		3.30033
B08	0.960111	12.8531	5.31818	0.0757161	1.80558	2.46078	2.12949	2.171	0.137083	12.345	0.131753	78.675	23.3069	35.5017	31.769	100.154	91.3873		38.65	3.65		3.1746
B09	0.921568	14.0075	5.39898	0.0797011	2.00316	2.25605	2.30136	2.36551	0.140888	11.453	0.100752	72.4649	22.3575	35.045	30.2892	102.314	98.0587		36.77	3.33		3.26797
B12	1.0919	15.2395	6.0167	0.0711333	1.41336	2.74041	2.10508	1.90355	0.180441	9.996	0.174933	74.0624	25.8329	36.4775	38.2876	114.096	100.905		9.35	1.55		6.53595
C01	0.549585	9.62504	2.97832	0.0364919	1.05415	4.73366	1.65216	2.11856	0.0855502	6.336	0.145201	42.511	11.9514	26.8048	15.1554	51.5367	49.3514		33.8	3.7		6.41026
C02	0.756965	13.5322	4.92545	0.0652553	1.8046	2.68249	2.48542	2.30878	0.121061	9.374	0.111824	66.3646	17.9684	31.7439	27.8915	83.1765	87.5512		33.48	3.22		3.26797
C03	0.752492	10.6805	4.12271	0.0578629	1.60173	4.55	2.06007	2.1928	0.114554	7.728	0.141798	59.9516	13.1483	25.1352	22.6037	69.0339	65.2521		13.49	1.71		6.34921
C04	0.804118	11.3958	4.34911	0.0680444	1.90528	7.60937	1.97398	2.00159	0.122145	8.409	0.128185	61.7246	14.7875	28.6802	23.9436	75.4243	68.198		27.95	3.55		15.5763
C07	0.767609	11.5601	4.30259	0.0603831	1.78035	6.18065	1.92273	2.12263	0.119323	8.934	0.148604	59.344	15.7849	31.4705	24.9139	73.7012	70.3021		19.89	2.31		13.0719
C09	0.672926	11.4175	3.89659	0.0443337	1.40847	2.8273	1.41864	2.1092	0.102336	8.476	0.158325	58.0179	14.2242	26.9066	19.0782	62.4978	65.4244		26.23	3.17		9.70874
D03	4.46723	3.768	41.006	0.256367	0.67914	3.66226	0.958464	1.23624	0.23063	12.254	4.86992	83.4765	40.239	46.272	6.74982	145.432	88.88		31.9417	3.24583		6.47249
D11	2.4445	6.90384	17.7034	0.145654	1.05244	7.96857	1.66983	2.01094	0.17263	10.007	1.51571	46.4662	25.5463	30.5398	10.1994	83.5693	60.154		15.87	2.43		14.6199
D13	0.598395	12.6397	8.01102	0.0540971	1.34392	1.27234	1.27627	2.97842	0.0909212	15.267	0.171611	29.1537	120.655	30.7889	12.6626	52.1977	60.5431		35.21	3.49		9.70874
